# Supplementary material
Source: publisher figshare collection journal article supplement (https://sage.figshare.com/ndownloader/files/22827104)
Supplement: Supplementary file 1 [file 22827104]

## Appendix

## The Marital Comparison Level Index-Revised

Please indicate how you think your current experiences in your marriage compare with your expectations. Here, the expectations are your unique opinions about what is acceptable to you in a marriage. Thus, these expectations are what you realistically expect from your marriage rather than your ideals.

With zero (0) representing your expectation level, please indicate to what degree your marriage currently compares favorably or unfavorably to your expectation level by circling the appropriate number. If your partner or your marital relationship exactly meets your expectation, then you would select 0.

For example, if you experience more love from your spouse than you would expect, then your answer would be either 1, 2, or 3 depending on the degree to which the love you experience is greater than your expectations. A score of 3 means that your experiences of love are much greater than you expect. A score of 1 or 2 would be indicative of your experiences being somewhat greater than you expect. However, your answer would be -3, if your experiences with your partner was much worse than you would expect.

As another example, if you experience more conflicts in a certain area than you would expect, then your answer would be either -1, -2, or -3. However, if you have less conflicts than you would expect, your answer would be either 1, 2, or 3, depending on your expectation level. So please keep in mind that a higher score would indicate a more favorable evaluation of your marriage relative to expectations.

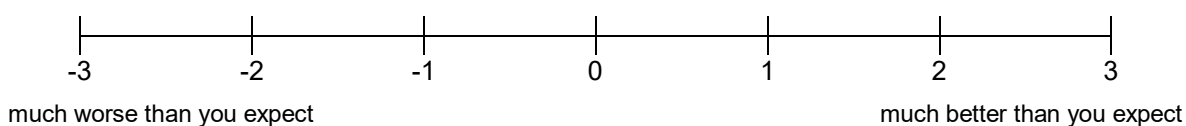

1. The amount of love you get from your spouse
2. The amount of compatibility that you experience
3. The amount of mutual respect you experience
- \*4. The degree to which your emotional needs are met by your spouse

- \*5. The degree to which your sexual needs are met by your spouse
- \*6. The degree to which your financial needs are met by your relationship
- 7. The amount of affection your spouse displays
- 8. The amount of commitment you experience from your spouse
- 9. The amount your spouse is willing to listen to you
- 10. The degree to which your interpersonal communications are effective
- 11. The amount of companionship you experience
- 12. The amount of relationship equality you experience
- 13. The amount of confiding that occurs between you and your spouse
- 14. The amount your spouse is trusting of you
- 15. The fairness with which money is spent
- 16. The amount of time you spend together
- 17. The degree of physical attractiveness of your spouse
- 18. The amount of conflict over daily decisions that exist
- 19. The amount of interest in sex your spouse expresses
- 20. The amount of arguing over petty issues that you experience
- 21. The amount of sexual activity that you experience
- 22. The amount of conflict over the use of leisure time that you experience
- 23. The amount of criticism your spouse expresses
- 24. The amount that you and your spouse discuss sex
- 25. The amount to which you and your spouse agree on your lifestyle
- 26. The amount of disagreement over friends you experience
- 27. The amount of freedom you experience in pursuing other friendships
- 28. The amount to which your spouse supports your choice of an occupation

29. The degree to which the responsibility for household tasks is shared
  30. The amount of conflict over money you experience
  31. The amount of jealousy your spouse expresses
  32. The amount of privacy you experience
  33. The degree to which you and your spouse agree on the number of children to have
  34. The amount of responsibility your spouse accepts for household tasks
  35. The amount of conflict over issues involving religious activity
  - \*36. The amount of contact that you have with in-laws
  - \*37. The amount of conflict you experience with your spouse over issues involving your in-laws
  - \*38. The amount of conflict you experience with your spouse over issues involving your parents.
  - \*39. The degree of financial support you receive from your parents
  - \*40. The degree of financial support you receive from your in-laws
  - \*41. The degree of financial support you provide to your parents
  - \*42. The degree of financial support you provide to your in-laws
  - \*43. The degree to which your spouse's work-related stress affects your relationship
  - \*44. The amount of time your spouse spends on electronic devices (e.g., smartphone, tablet PC, laptop/computer, TV, Play Station, etc)
  - \*45. The amount of time your spouse spends on electronic devices (e.g., smart phone, tablet PC, laptop/computer, TV, Play Station, etc) when you both are supposed to be doing things together
  - \*46. The amount of time your spouse spends working
- \*denotes newly added items
